# Supplementary material for: Disruption of metabolic licensing by JAK inhibitors constrains CD8 T cell activation and effector function
Source: Research Square preprint supplement (doi:10.21203/rs.3.rs-7794494/v1), 2025-10-27
Supplement: Supplementary file 1 [file 07427da6bd65deee04da2ed5.docx]

**Table**

**Table 1. Demographic, biochemical and clinical characteristics of healthy donors and RA patients**

|  | **HD** | **DMARDs-MTX** | **JAKis** |
| --- | --- | --- | --- |
| n | 9 | 8 | 10 |
| Sex  (F/M) | 7/2 | 6/2 | 7/3 |
| Age range (years) | 30-58 | 33-68 | 30-77 |
| ESR mm/h  (median±QD) |  | 4 ± 1.5 | 5.5±8.5 |
| CRP mg/L  (median±QD) |  | 1.1±9 | 1.2±2.5 |
| DAS28 (mean±SD) |  | 2.4±1 | 2.5±1.1 |
| RF (+/-) |  | 21/14 | 10/0 |
| Anti-CCPs (+/-) |  | 23/12 | 9/1 |

Anti-CCPs: Anti-cyclic citrullinated proteins, CRP: C-reactive protein, DAS: disease activity score, DMARDs: disease-modifying antirheumatic drugs, ESR: erythrocyte sedimentation rate, HD: healthy donors, QD: quartile deviation, RF: rheumatoid factor, Tofa: tofacitinib, uTx: untreated.
