# Supplementary material for: Disruption of metabolic licensing by JAK inhibitors constrains CD8 T cell activation and effector function
Source: Research Square preprint supplement (doi:10.21203/rs.3.rs-7794494/v1), 2025-10-27
Supplement: Supplementary file 2 [file ad8a5c46c0f0c131ee6a14e9.docx]

**Supplementary information**

**Figure S1. Impact of JAK inhibitors on CD8 T cell activation, proliferation, and effector molecules expression.** Naïve and memory CD8 T cells from healthy donors (HD) were polyclonally stimulated for 3 days (Act) in the presence or absence of tofacitinib (Tofa), upadacitinib (Upa), or baricitinib (Bari). (A) Representative histograms showing the Ki-67, CD25, CD137, TNF, and GZMB expression in naïve and memory CD8 T cells under control conditions and in the presence of each JAK inhibitor (1µM). (B) Representative histograms illustrating the dose–response effects of JAK inhibitors (0.1–3 µM) on the same markers after stimulation as in (A). Data are representative of 2 experiments.

**Figure S2. Effect of JAK inhibitors on glucose uptake and GLUT1 expression in CD8 T cells.** Naïve and memory CD8 T cells from healthy donors (HD) were polyclonally stimulated for 3 days (Act) in the presence or absence of tofacitinib (Tofa), upadacitinib (Upa), or baricitinib (Bari). (A, B) Percentage of 2-NBDG⁺ cells within naïve (A) and memory (B) CD8 T cells. (C, D) Percentage of GLUT1⁺ cells within naïve (C) and memory (D) CD8 T cells. Data are shown as individual values with mean ± SD and are representative of 3 independent experiments. P values were calculated using paired t-test (A–D).

**Figure S3. Effect of baricitinib on activation and metabolic markers** **in CD8 T cells.** Flow cytometry–based FlowSOM maps showing expression of CD69, CD25, IRF4, GLUT1, and HIF-1α in naïve (A) and memory (B) CD8 T cells (B) CD8 T cells from healthy donors (HD) after 3 days of polyclonal stimulation (Act) in the presence or absence of baricitinib (Bari). Data are representative of 2 independent experiments.

**Figure S4. Effect of JAK inhibitors on mitochondrial ROS and ultrastructure in CD8 T cells.** (A) Transmission electron microscopy (TEM) images showing cellular ultrastructure of CD8 T cells after activation with or without baricitinib. (B) Frequencies of naïve and memory mROS-positive CD8 T cells within CD25⁺ and CD25⁻ subsets after 3 days of polyclonally activation ± JAK inhibitors Data are representative of 3 independent experiments.

**Figure S5.** **RNA-seq analysis of AIM+ CD8 T cells.** (A) Sorting strategy of AIM+ CD8 T cells for RNA-seq after 3 days of activation ± baricitinib. (B) Volcano plot displaying significantly differentially expressed genes between Act+Bari and Act AIM+ CD8 T cells, with upregulated (violet) and downregulated (turquoise) genes. (C, D) enrichment plots and heat maps of leading-edge genes from representative enriched pathways confirm drug activity, highlighting IL2–STAT5 signaling, interferon-γ response, cell cycle, and DNA replication pathways. Data from n = 3 donors, 1 experiment.

**Figure S6. GSEA enrichment plots of transcriptomic changes in AIM+ CD8 T cells exposed to baricitinib.** Representative GSEA enrichment plots of metabolism-related pathways in AIM+ CD8 T cells after 3 days of activation ± baricitinib. Normalized enrichment scores (NES) and FDR q-values are indicated for each pathway. Data from n = 3 donors, 1 experiment.

**Figure S7. Effect of JAK inhibitors on p-mTOR and p-AKT in AIM+ CD8 T cells.** (A, B) Representative histograms of p-mTOR and p-AKT in AIM+ versus AIM- CD8 T cells. (C, D) Percentages of naïve and memory p-mTOR⁺ or p-AKT⁺ AIM+ CD8 T cells after 3 days of activation ± JAK inhibitors. Data are representative of 3 experiments. P values were calculated using paired t-test (C,D).
